# Supplementary material for: VISIR-I: small vessels – least-time nautical routes using wave forecasts
Source: Copernicus journal article supplement (doi:10.5194/gmd-9-1597-2016), 2016-05-02
Supplement: Supplementary file [file gmd-9-1597-2016-supplement-title-page.pdf › gmd-9-1597-2016-supplement-title-page.pdf]

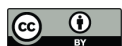

## *Supplement of*

## **VISIR-I: small vessels – least-time nautical routes using wave forecasts**

**Gianandrea Mannarini et al.**

*Correspondence to:* Gianandrea Mannarini ([gianandrea.mannarini@cmcc.it](mailto:gianandrea.mannarini@cmcc.it))

- [gmd-9-1597-2016-supplement-title-page.pdf](#)
- [caseStudy\\_1.mp4](#)
- [caseStudy\\_2.mp4](#)
- [caseStudy\\_3.mp4](#)

The copyright of individual parts of the supplement might differ from the CC-BY 3.0 licence.
